# Supplementary material for: Weaving of biomineralization framework in rotaliid foraminifera: implications for paleoceanographic proxies
Source: Copernicus journal article supplement (doi:10.5194/bg-15-6773-2018), 2018-11-14
Supplement: Supplementary file 1 [file bg-15-6773-2018-supplement.pdf]

Supplement of Biogeosciences, 15, 6773–6789, 2018  
<https://doi.org/10.5194/bg-15-6773-2018-supplement>  
© Author(s) 2018. This work is distributed under  
the Creative Commons Attribution 4.0 License.

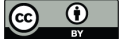

*Supplement of*

## **Weaving of biomineralization framework in rotaliid foraminifera: implications for paleoceanographic proxies**

**Yukiko Nagai et al.**

*Correspondence to:* Yukiko Nagai ([nagai.y@jamstec.go.jp](mailto:nagai.y@jamstec.go.jp))

The copyright of individual parts of the supplement might differ from the CC BY 4.0 License.

2017/12/07 10:50:54

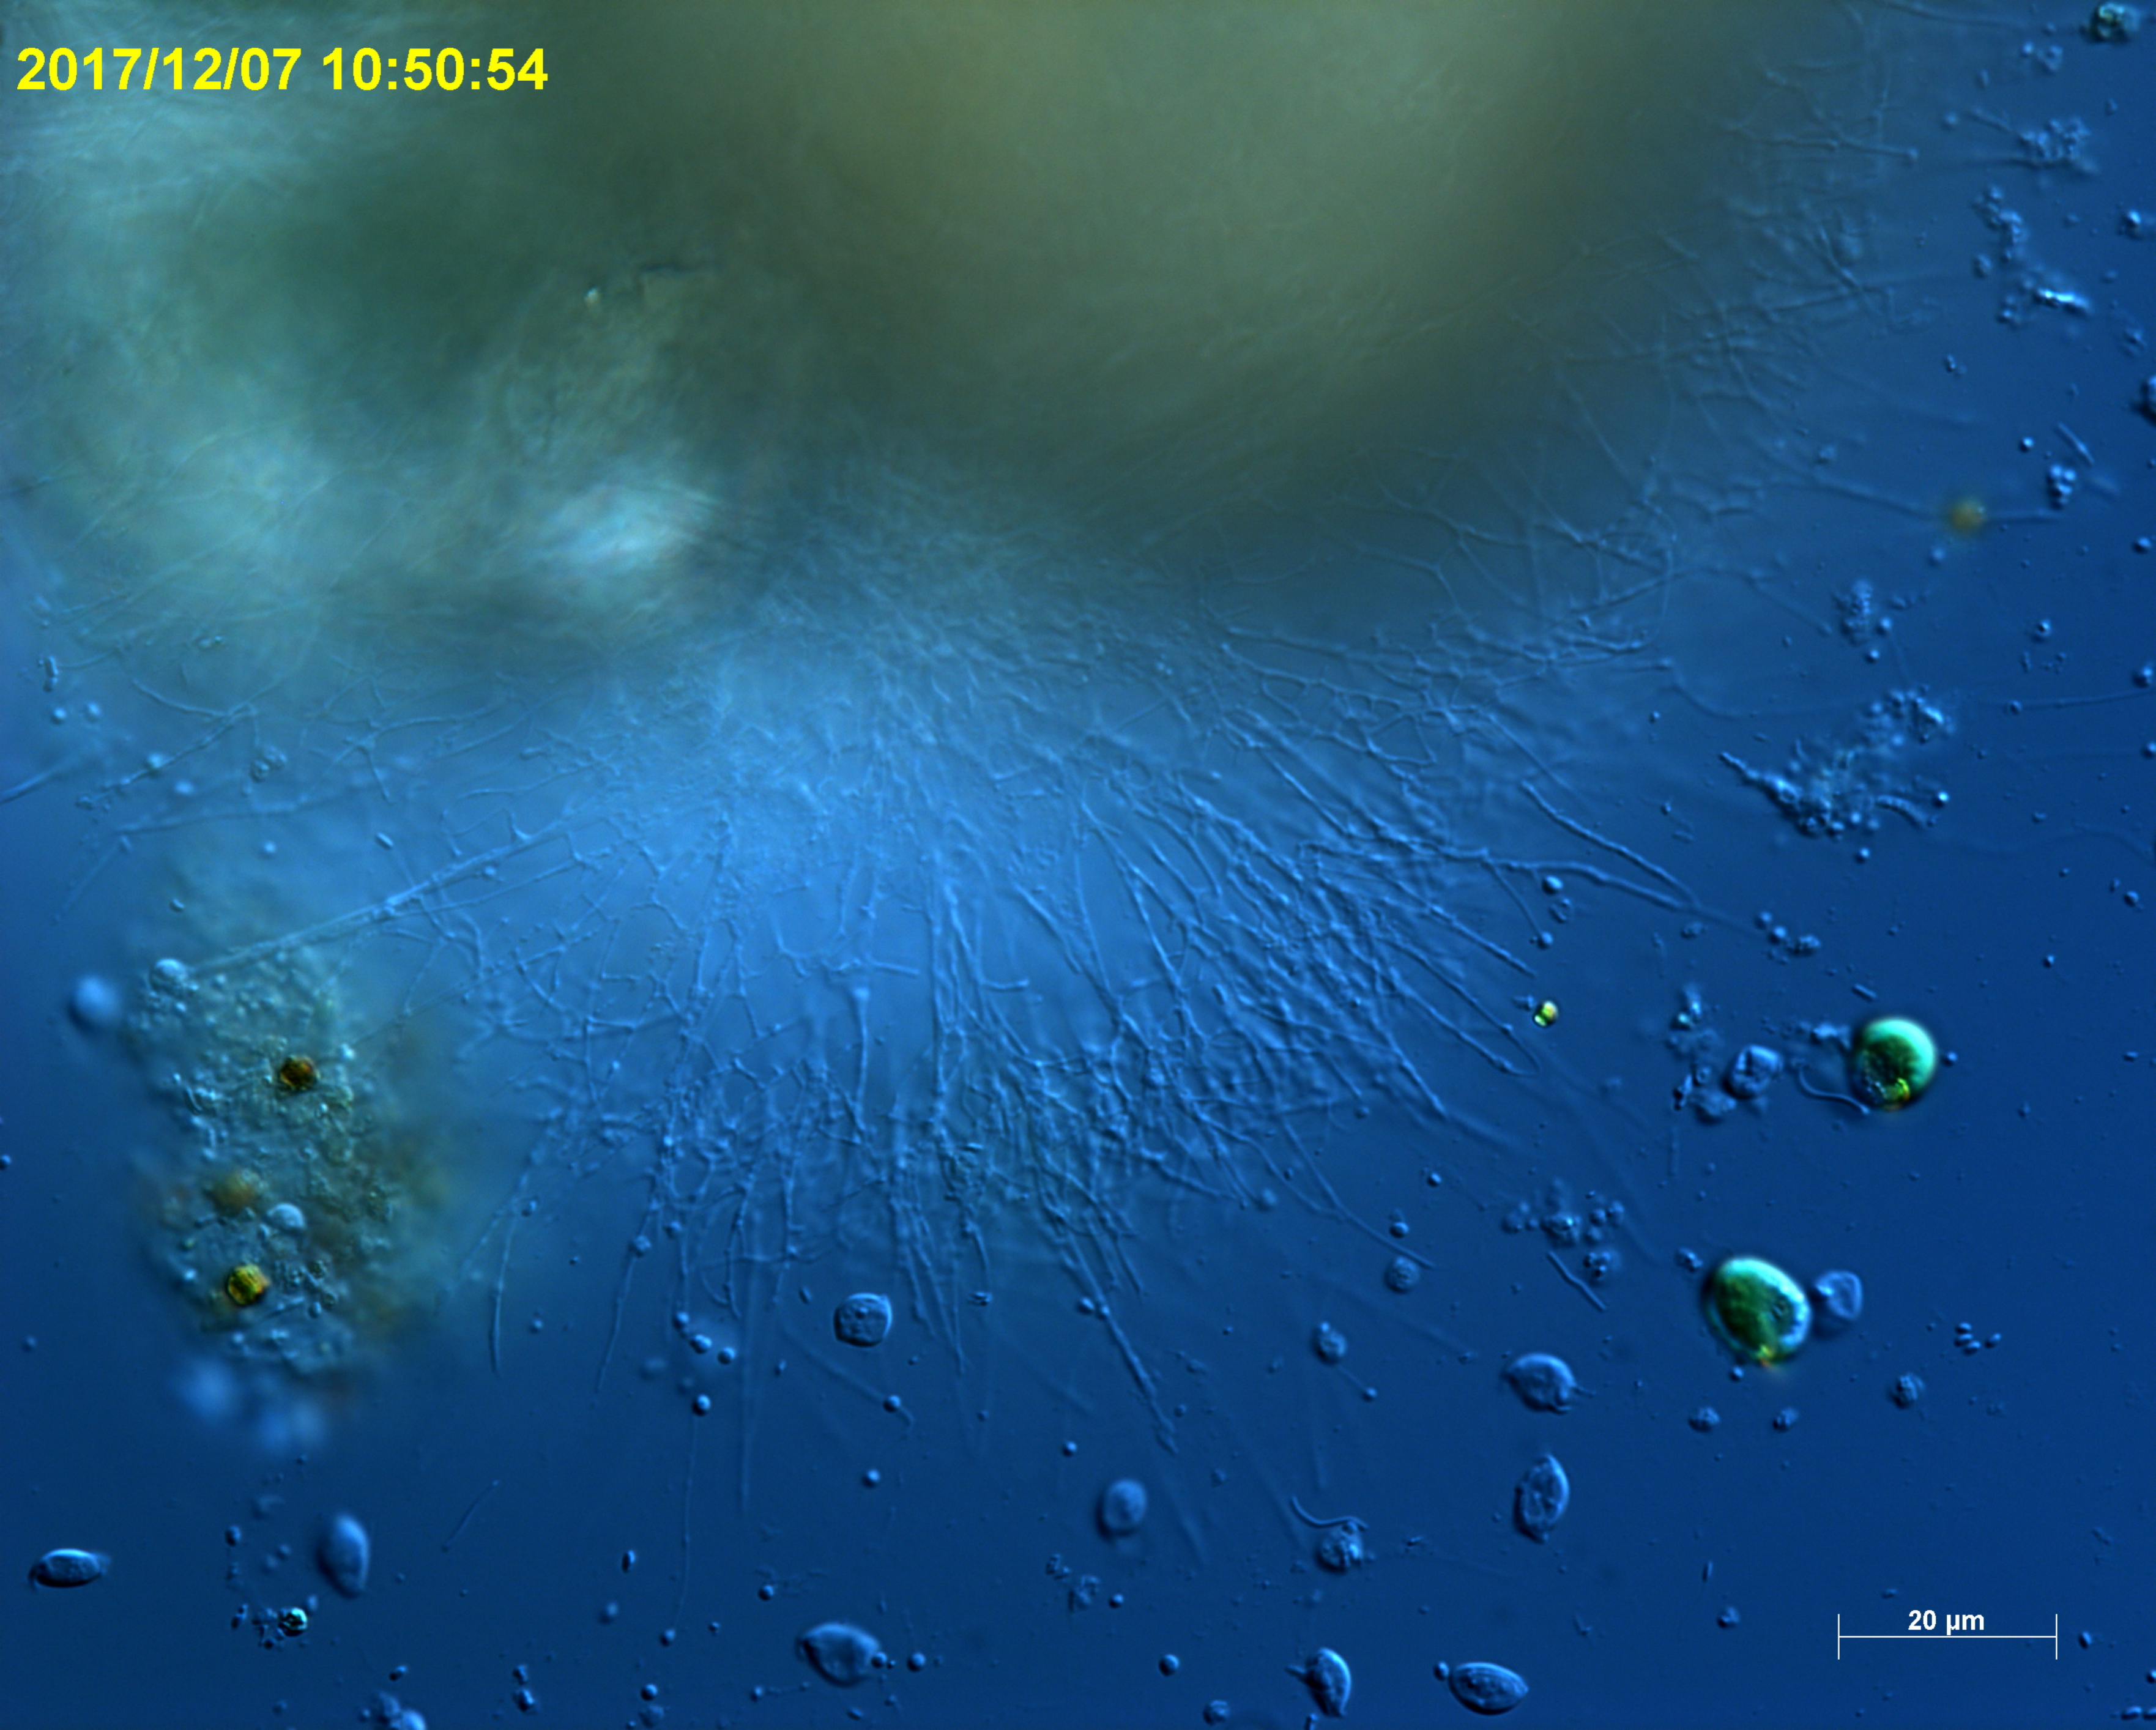

20  $\mu\text{m}$

2017/12/07 11:01:52

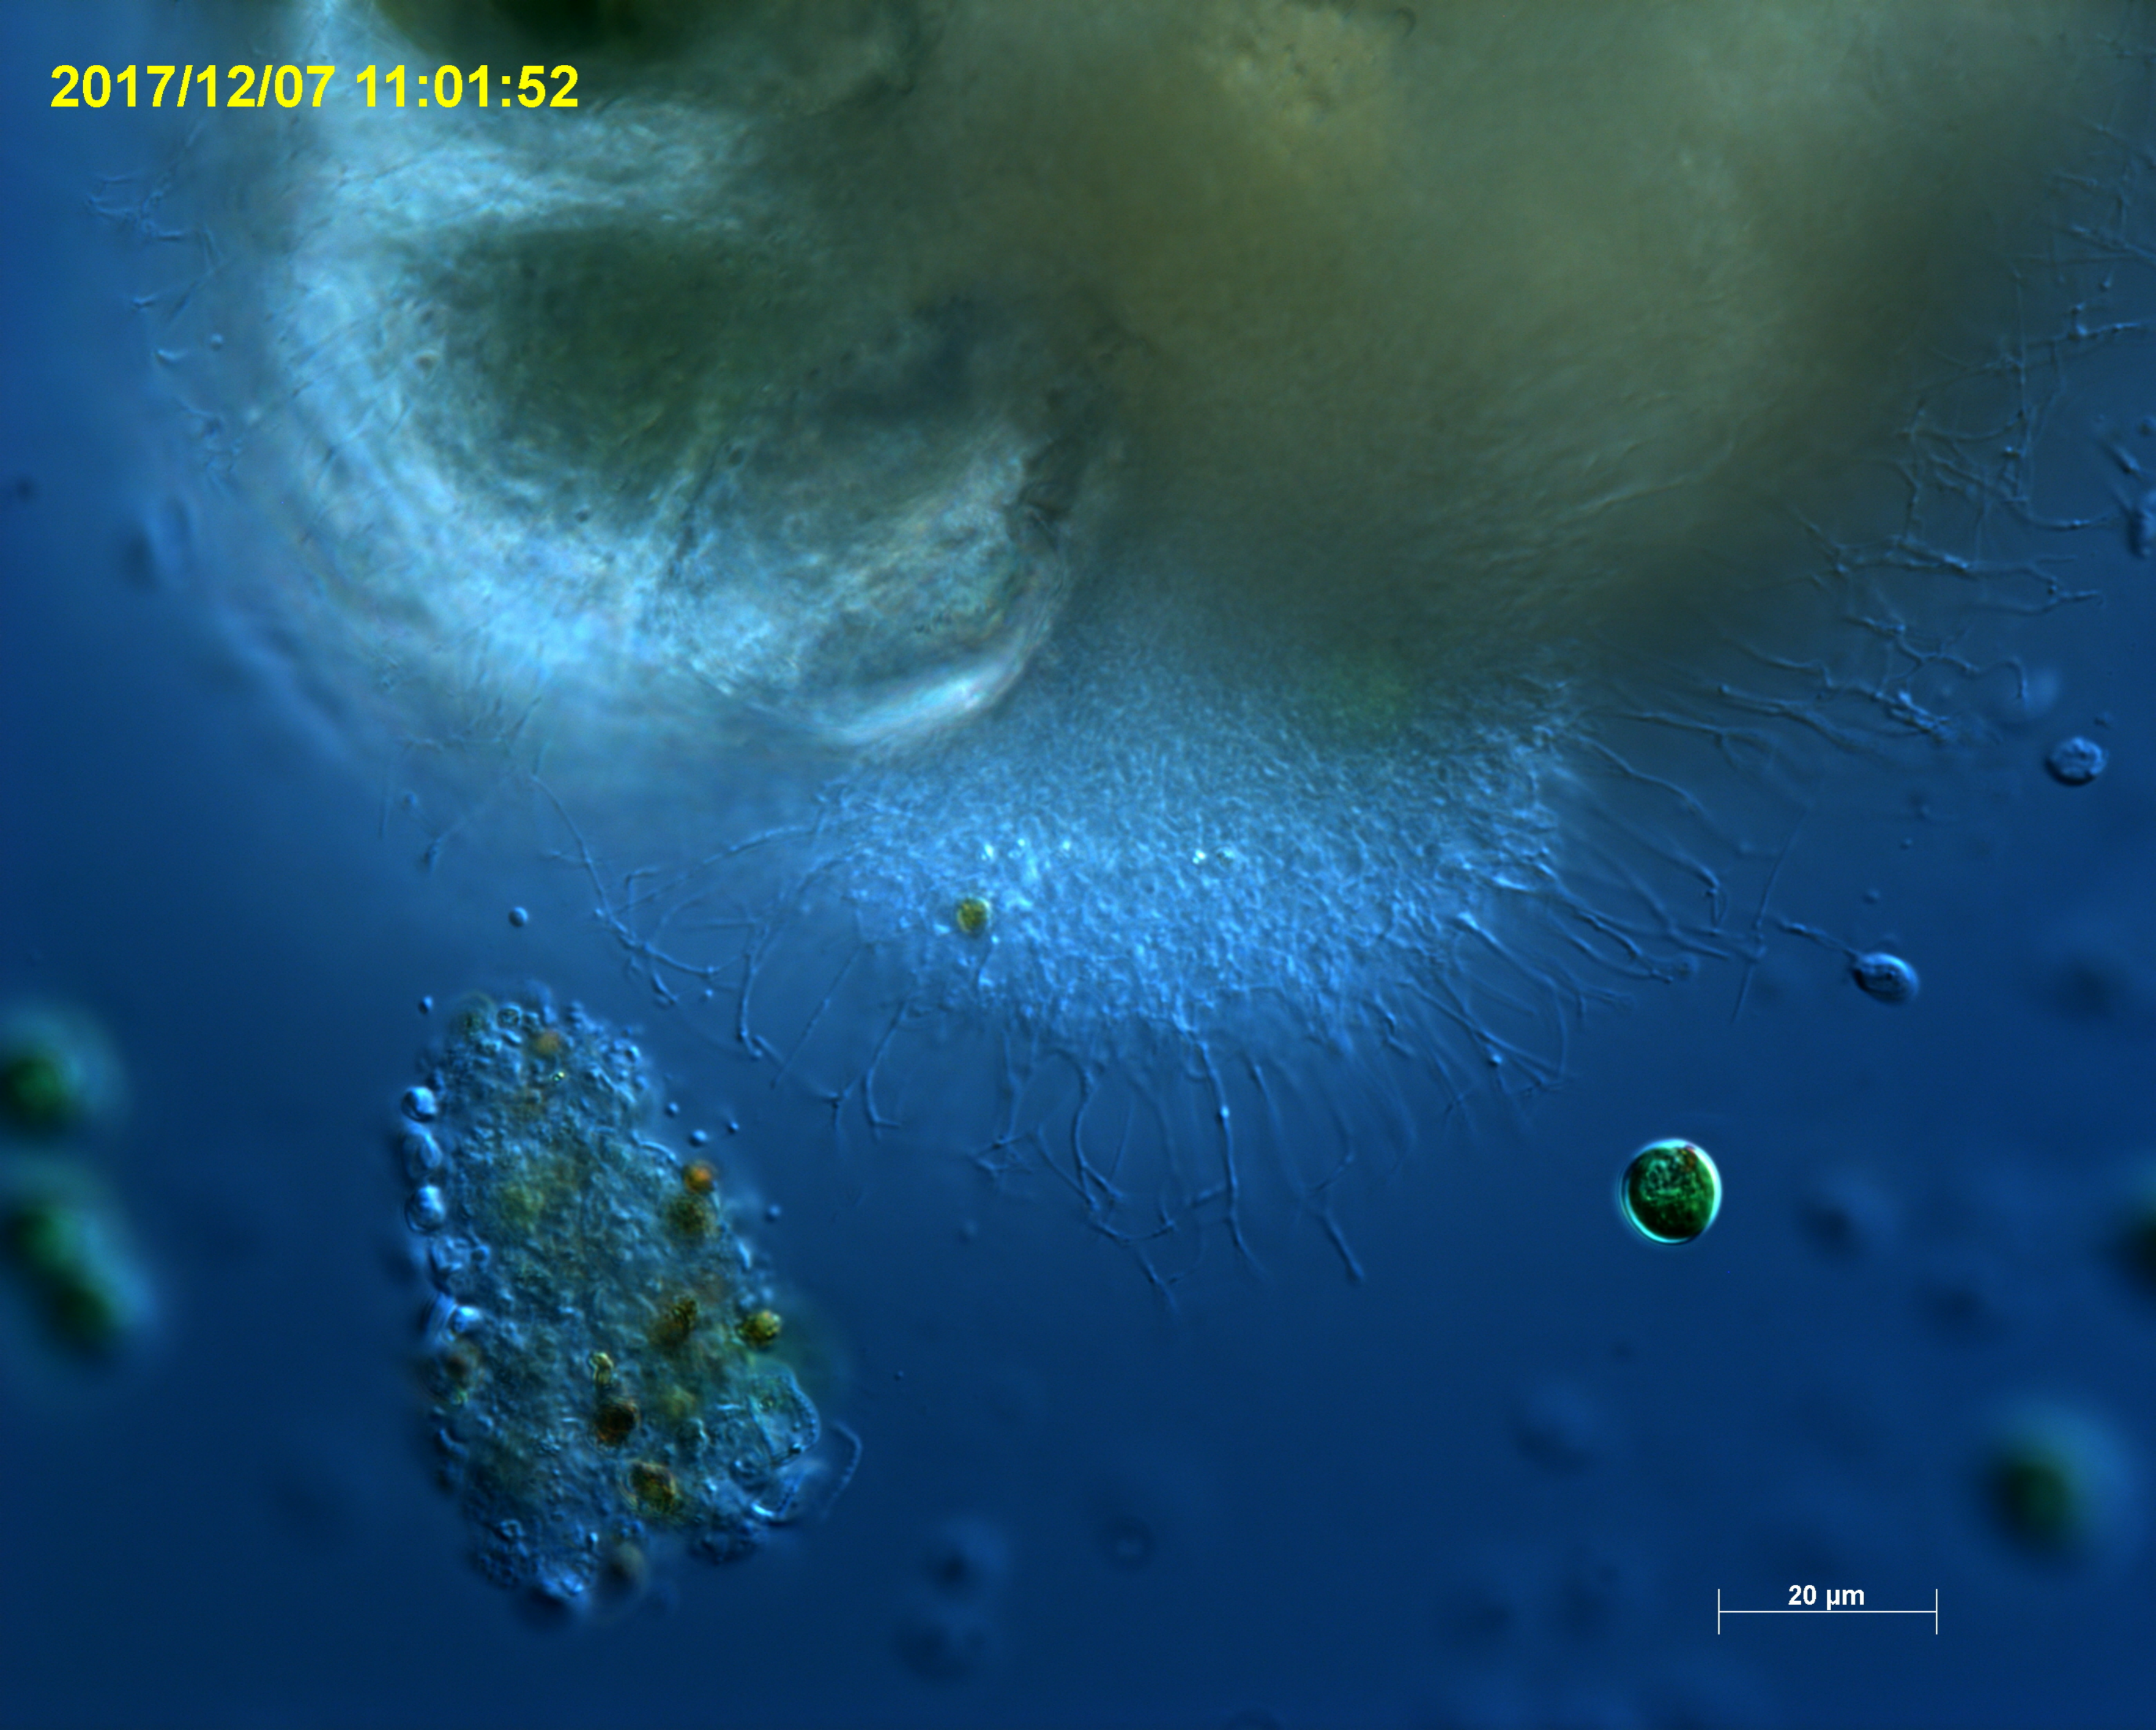

20 μm

2017/12/07 11:17:22

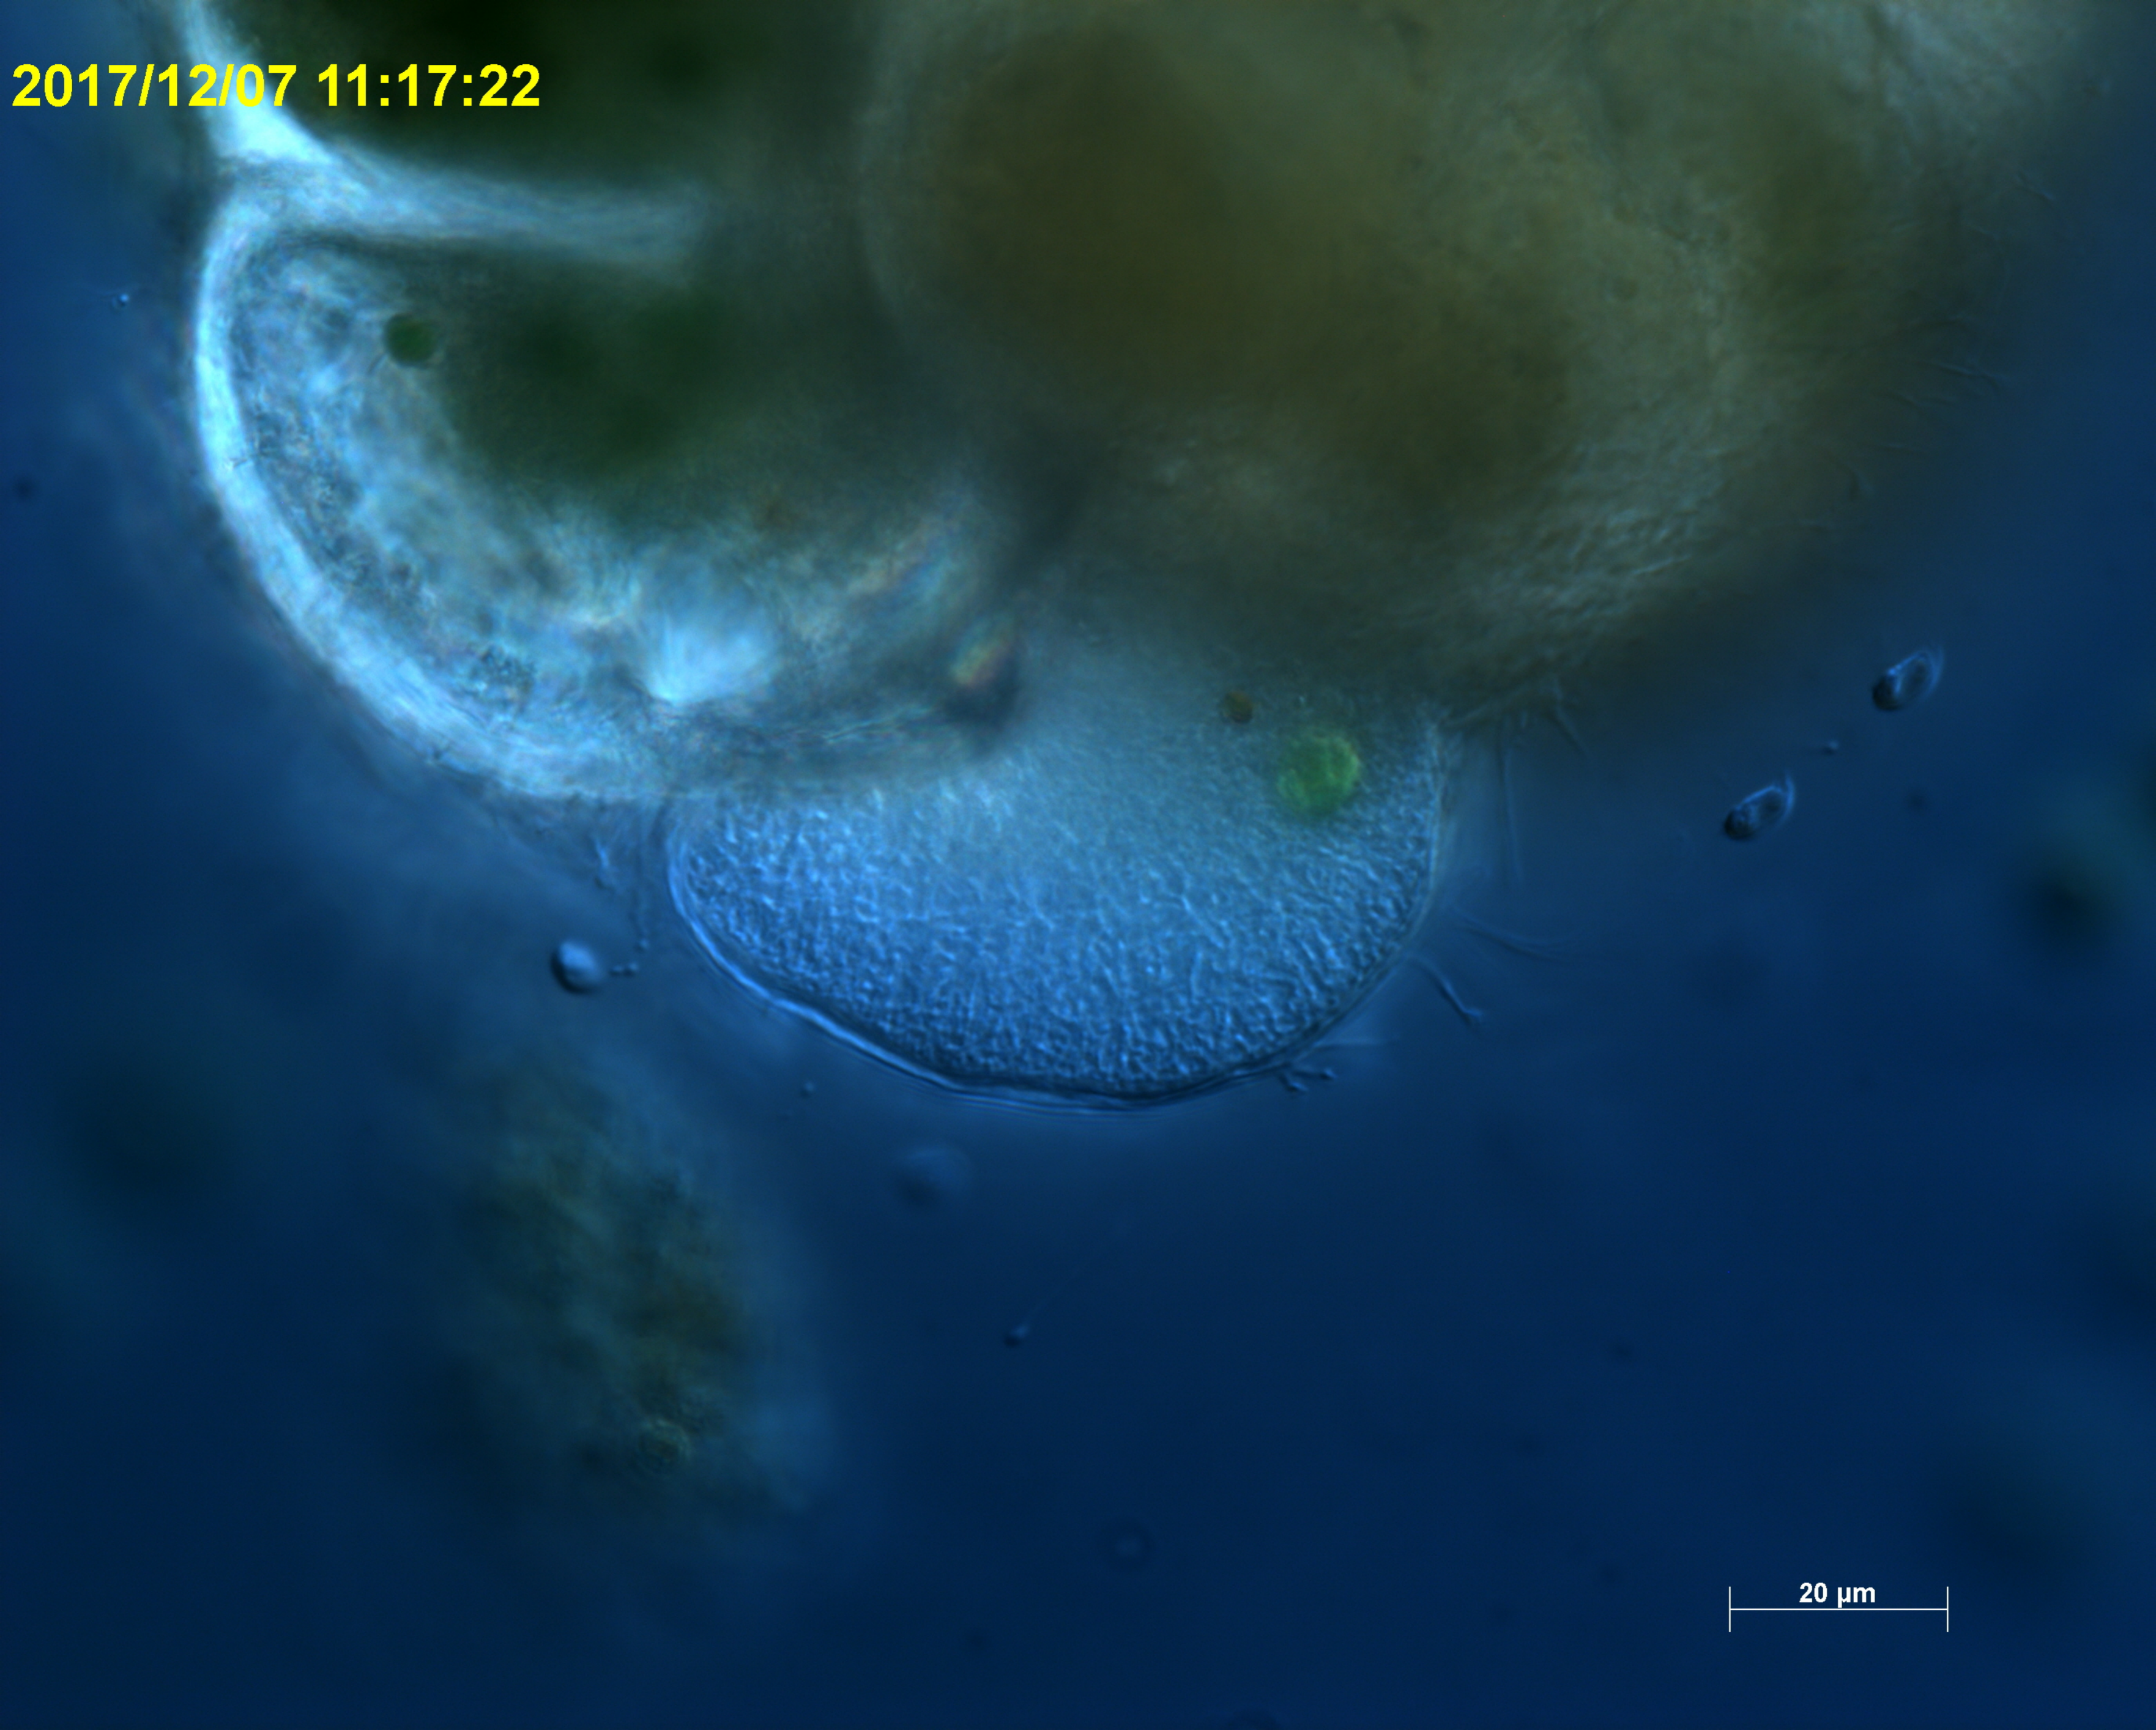

20 μm

2017/12/07 11:31:42

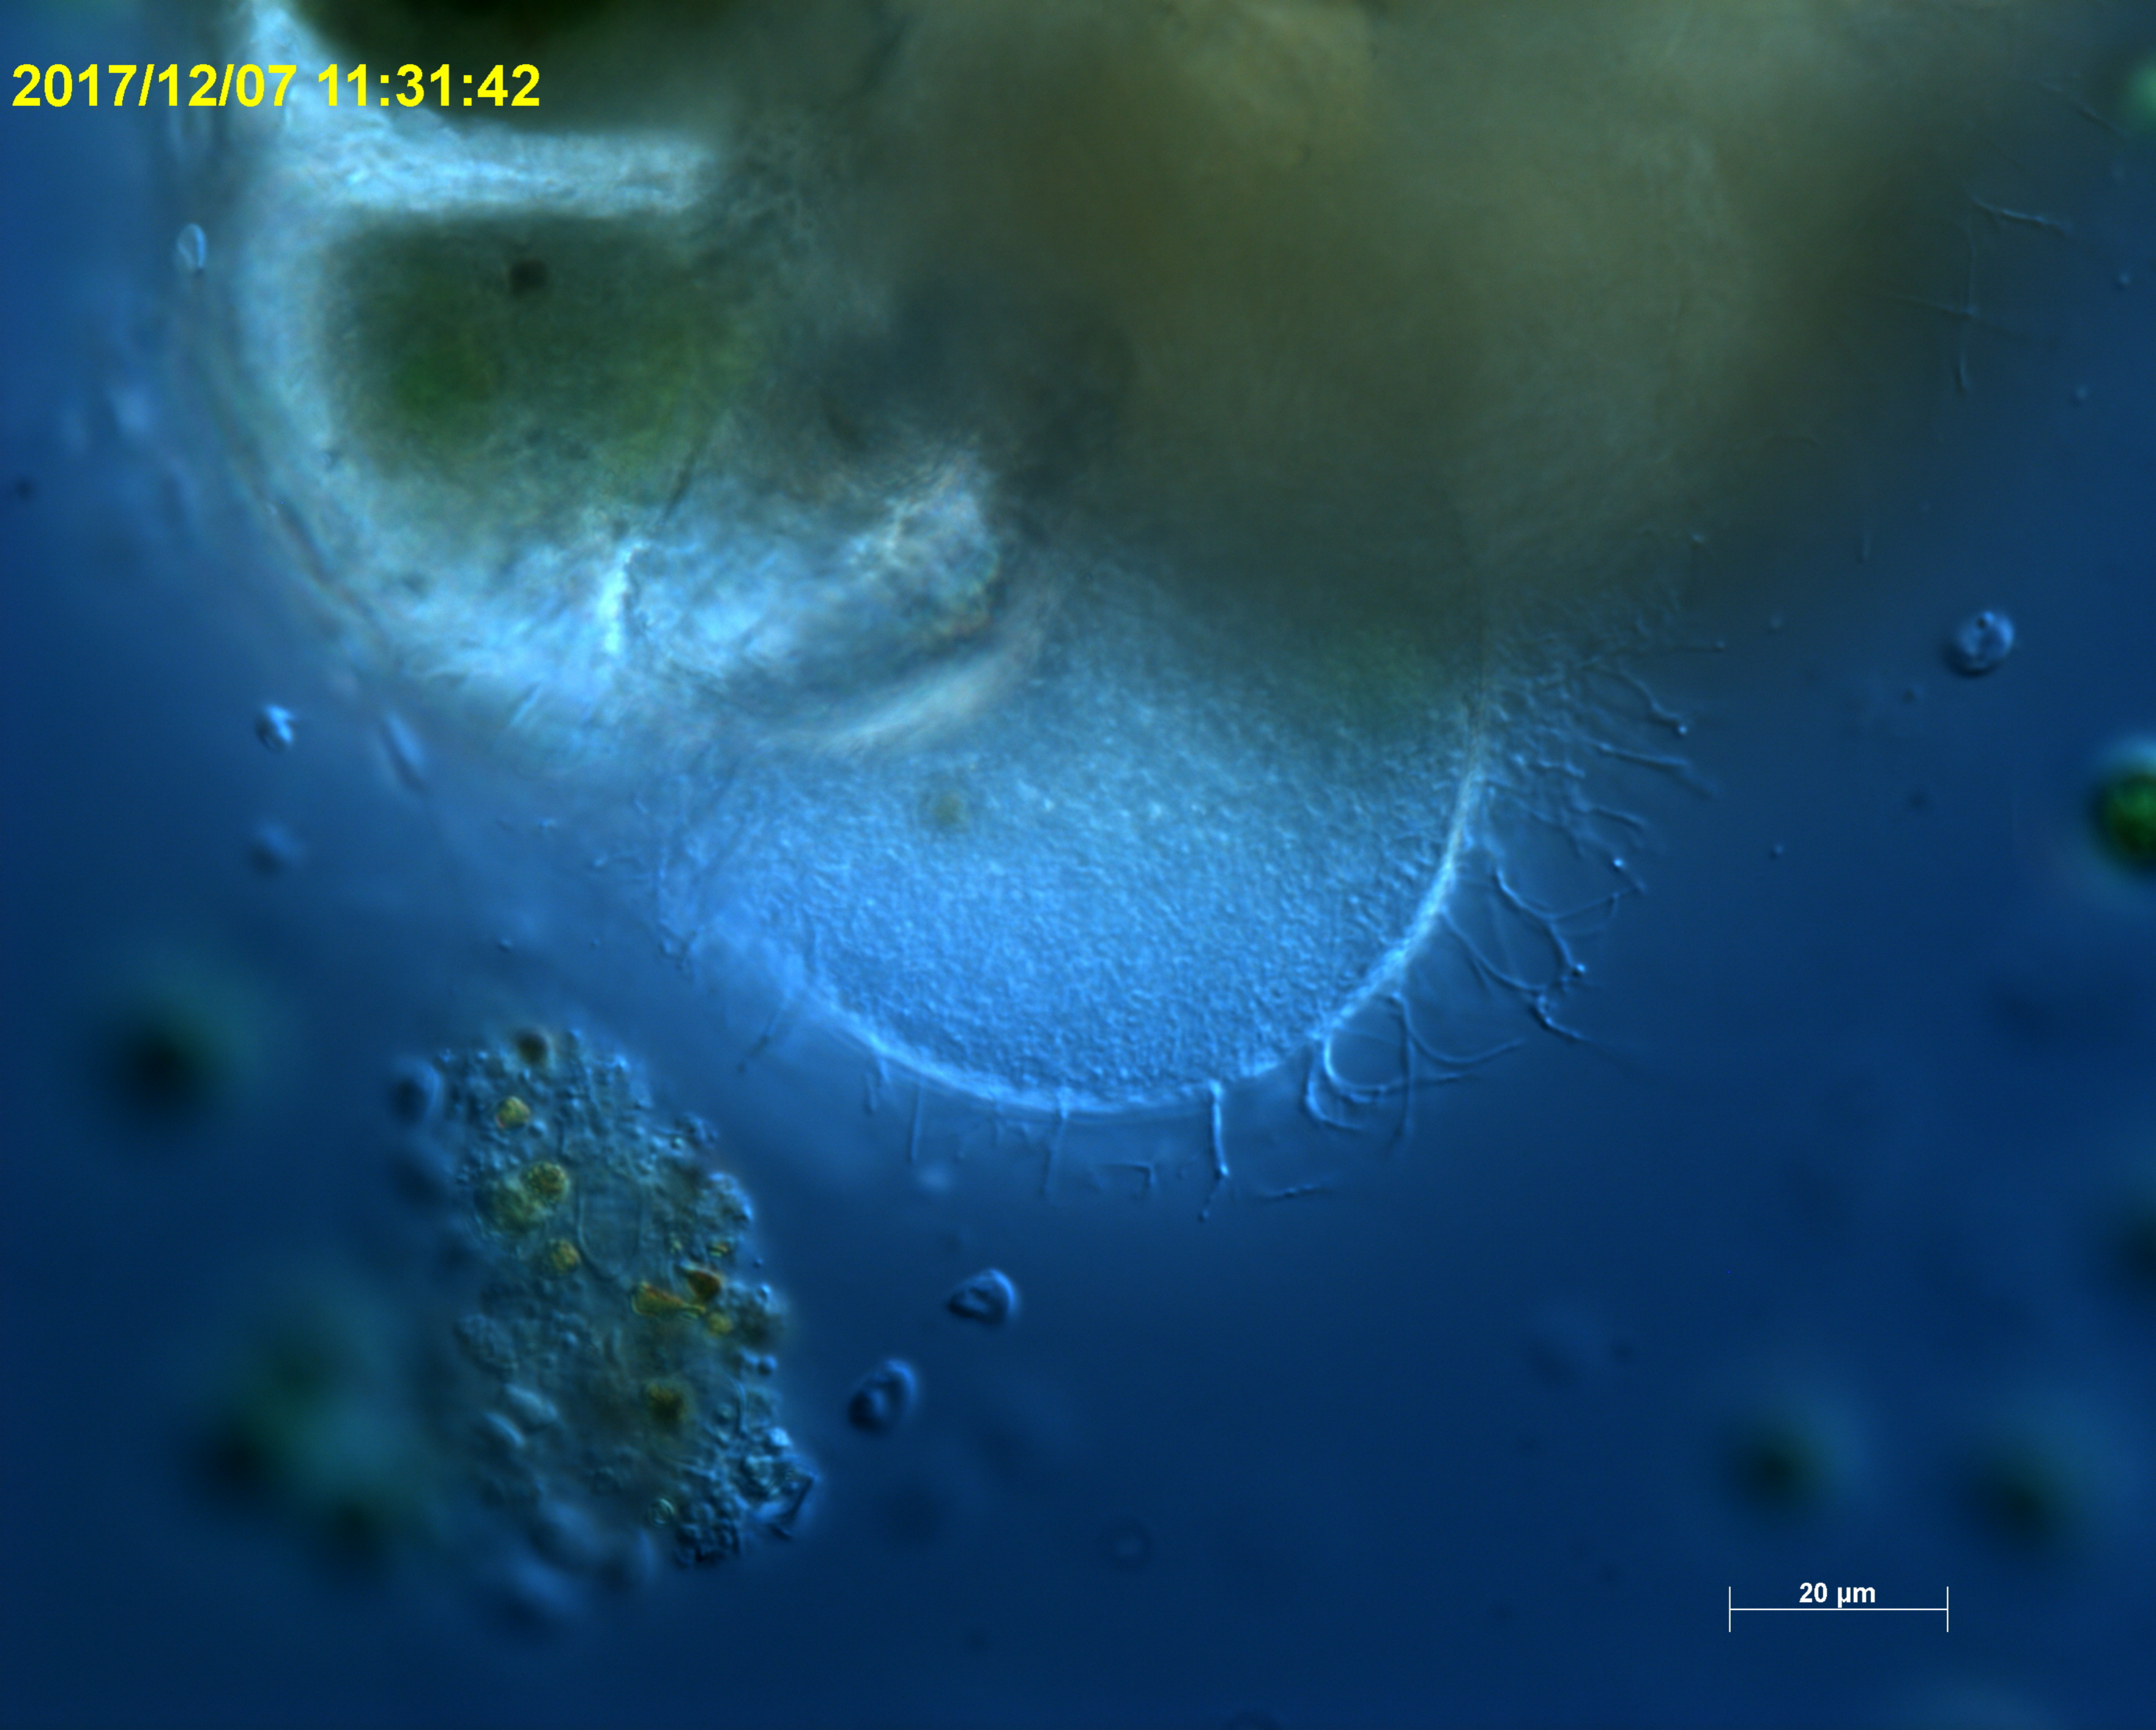

20 μm

2017/12/07 11:36:02

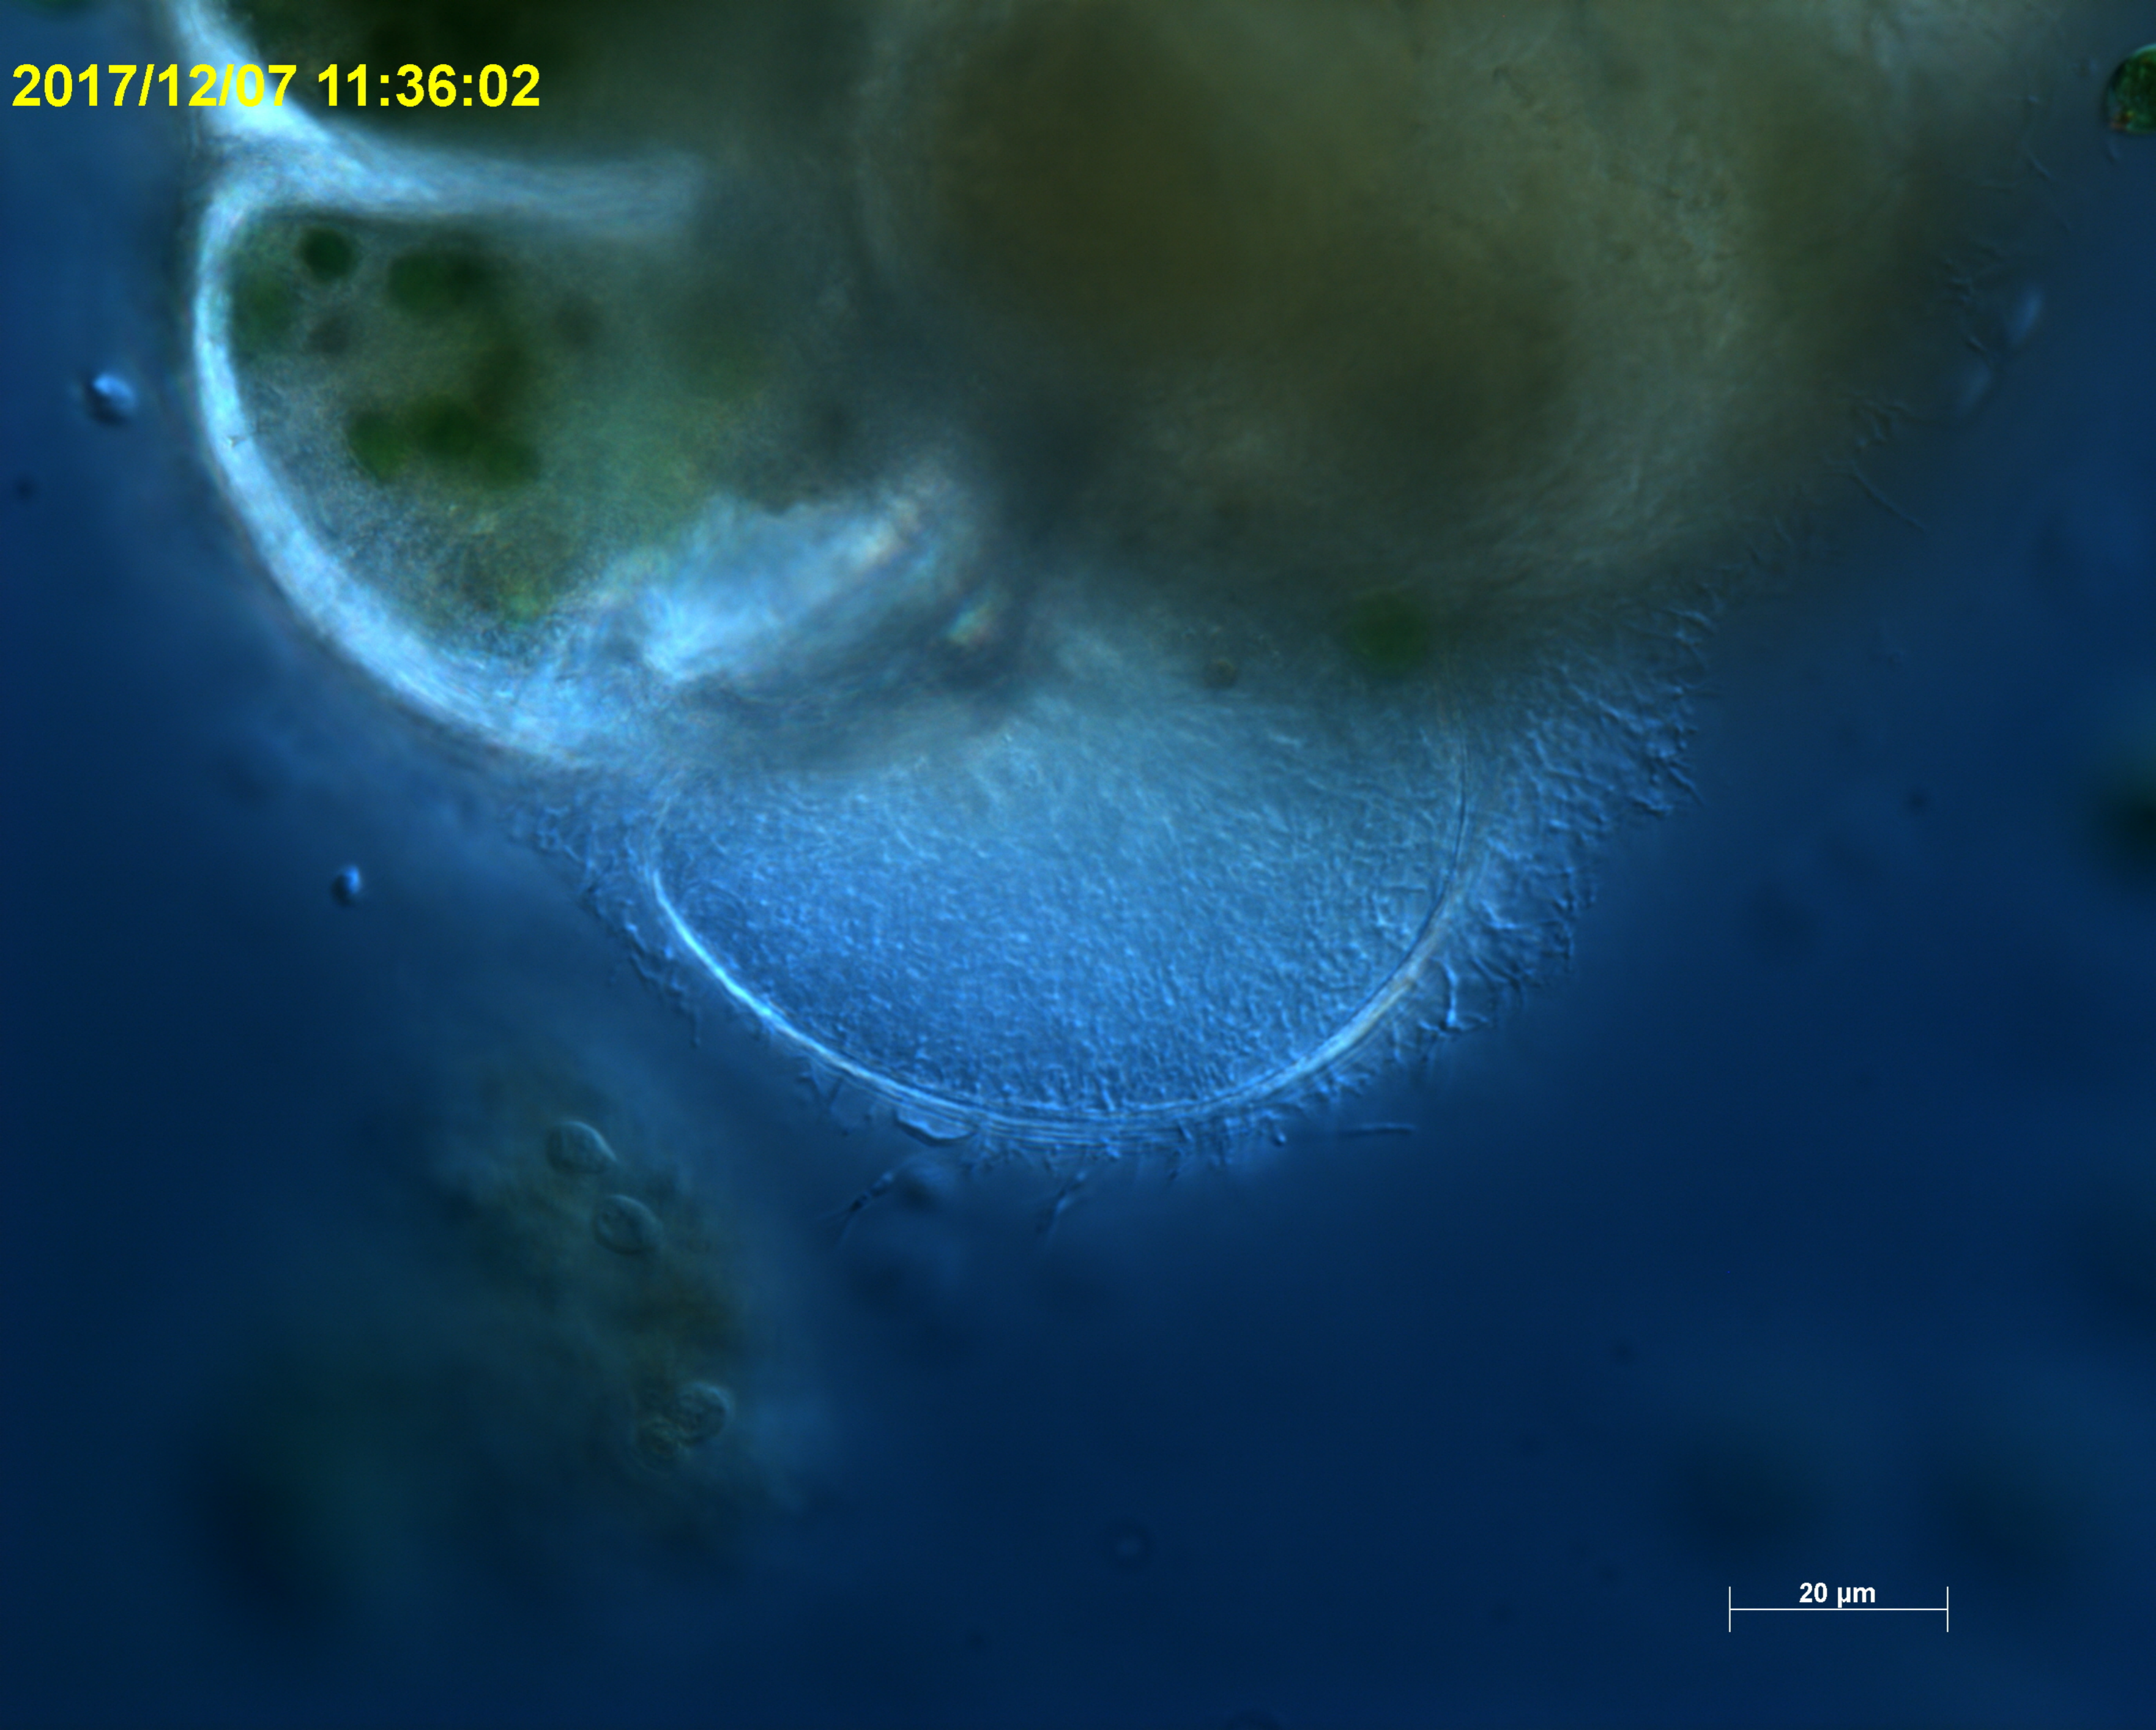

20 μm

2017/12/07 12:01:15

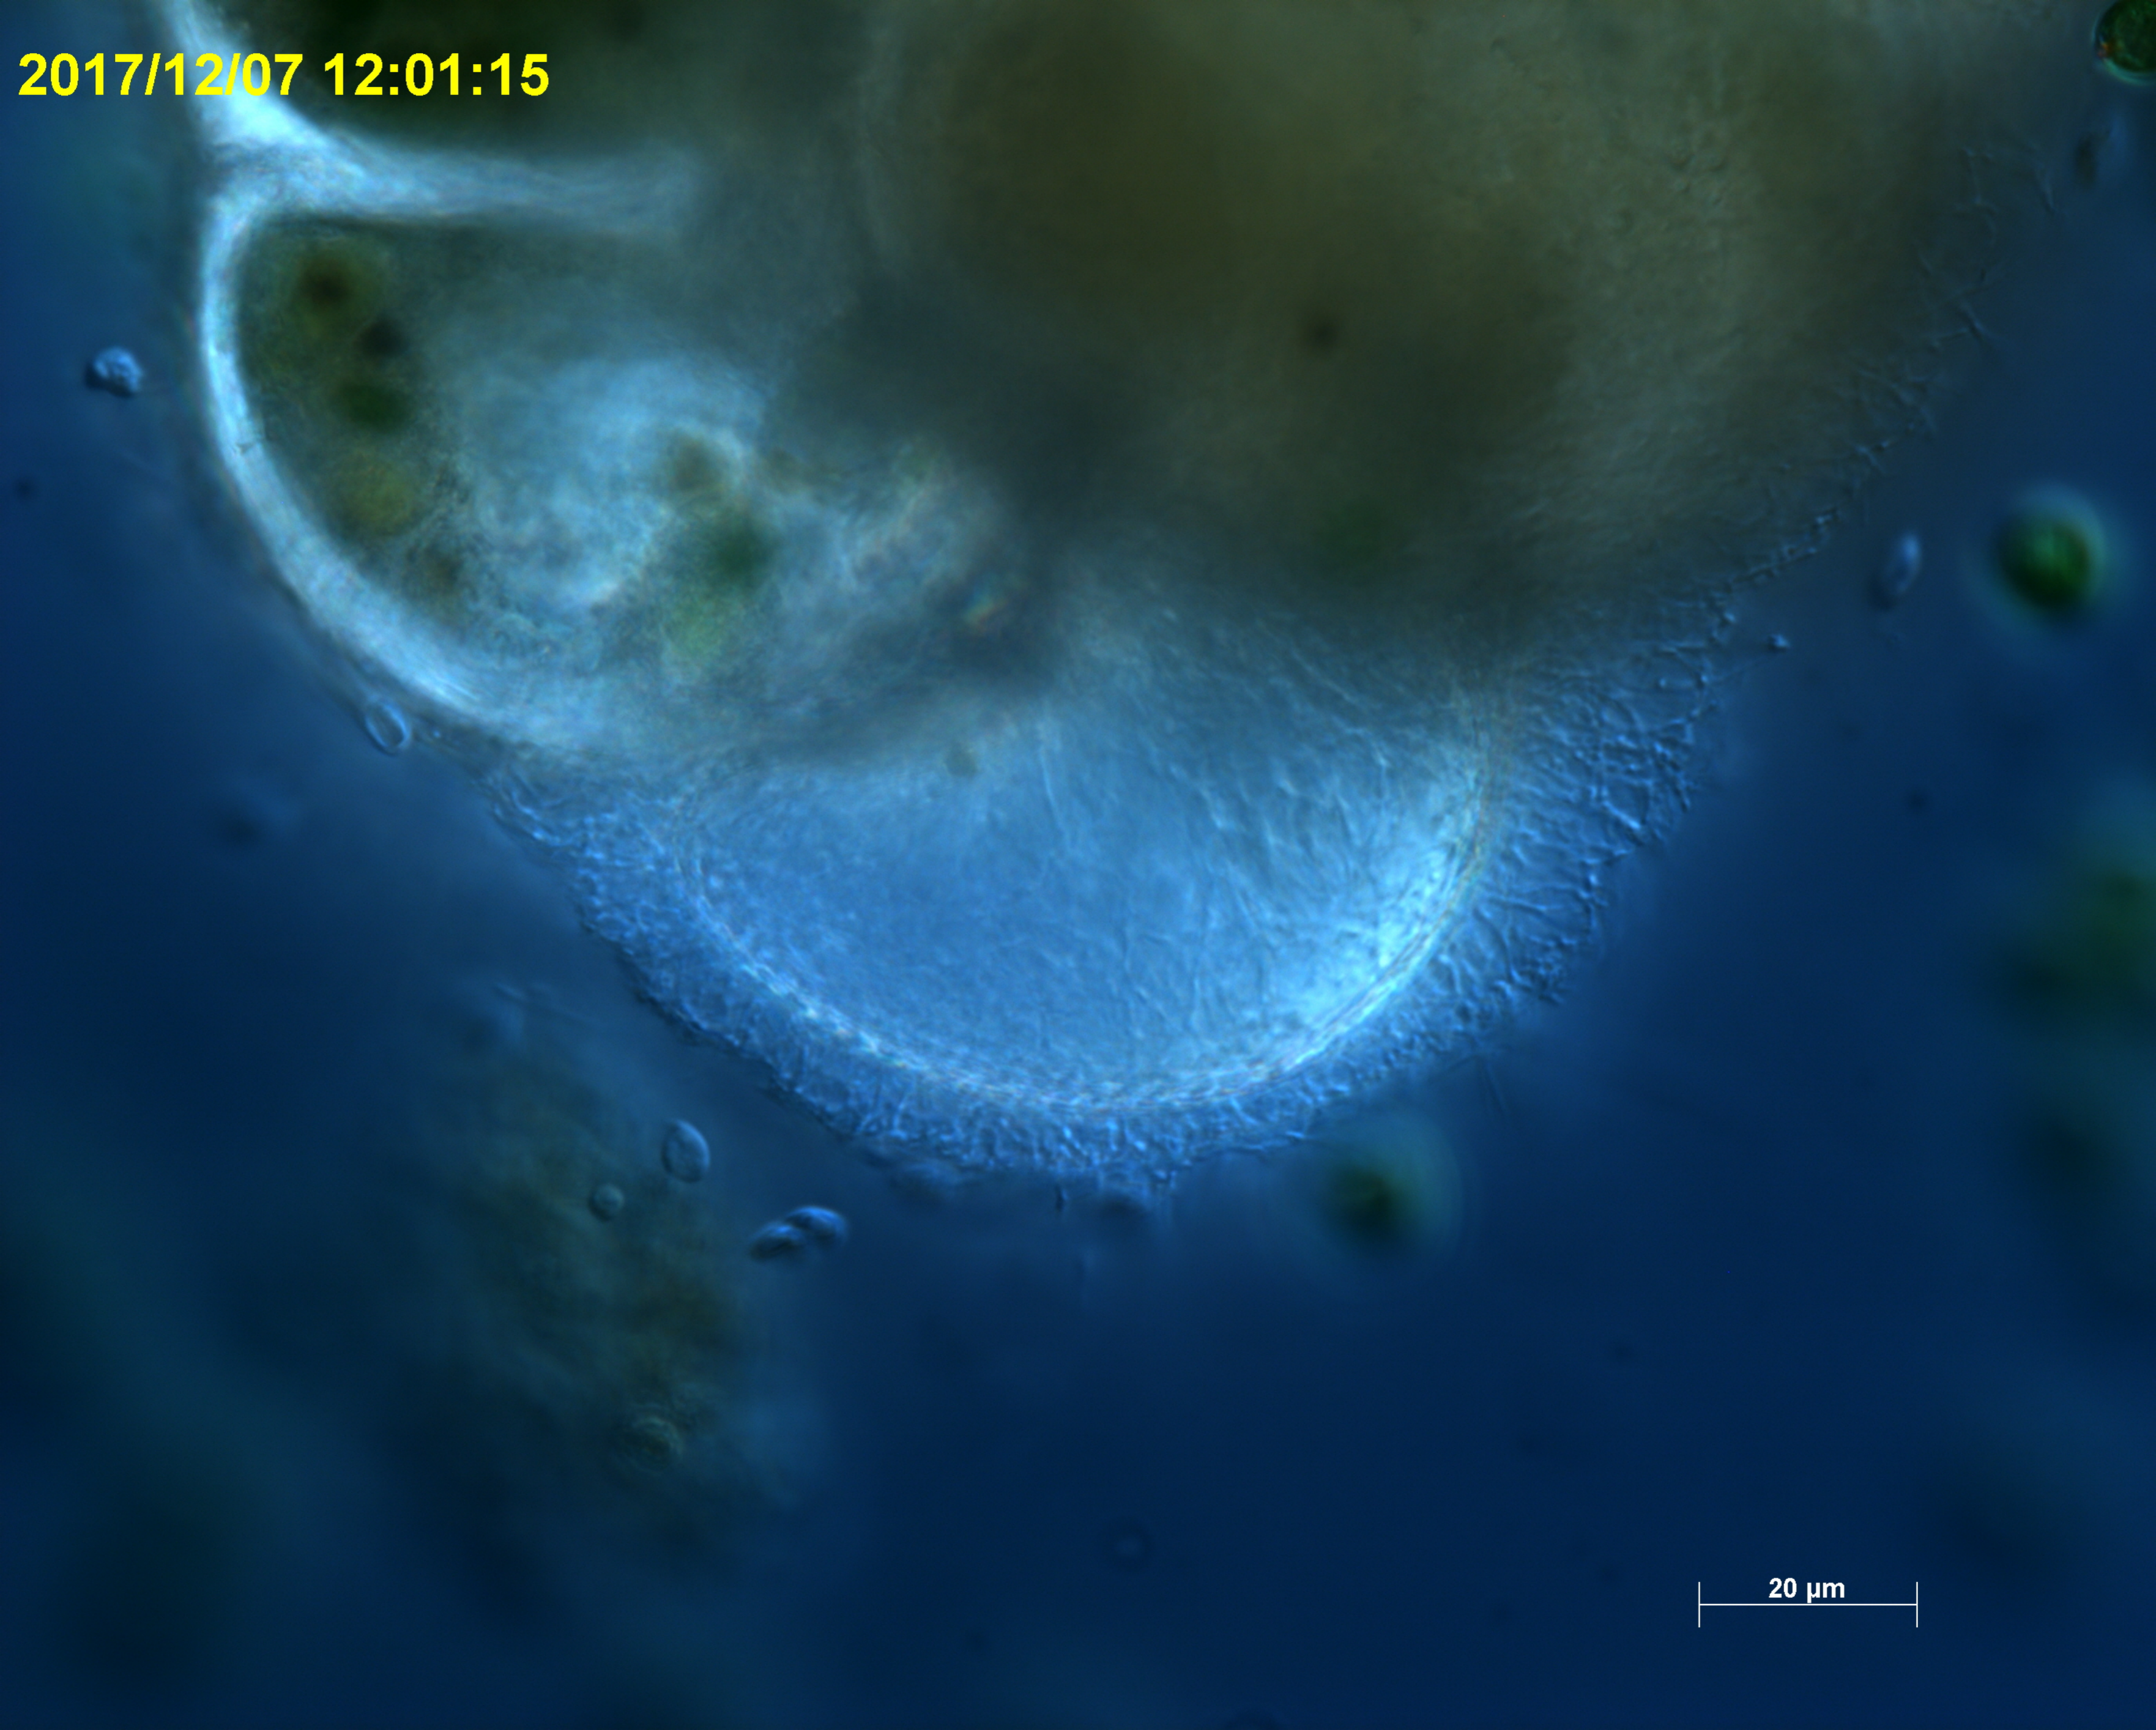

20 μm

2017/12/07 13:12:14

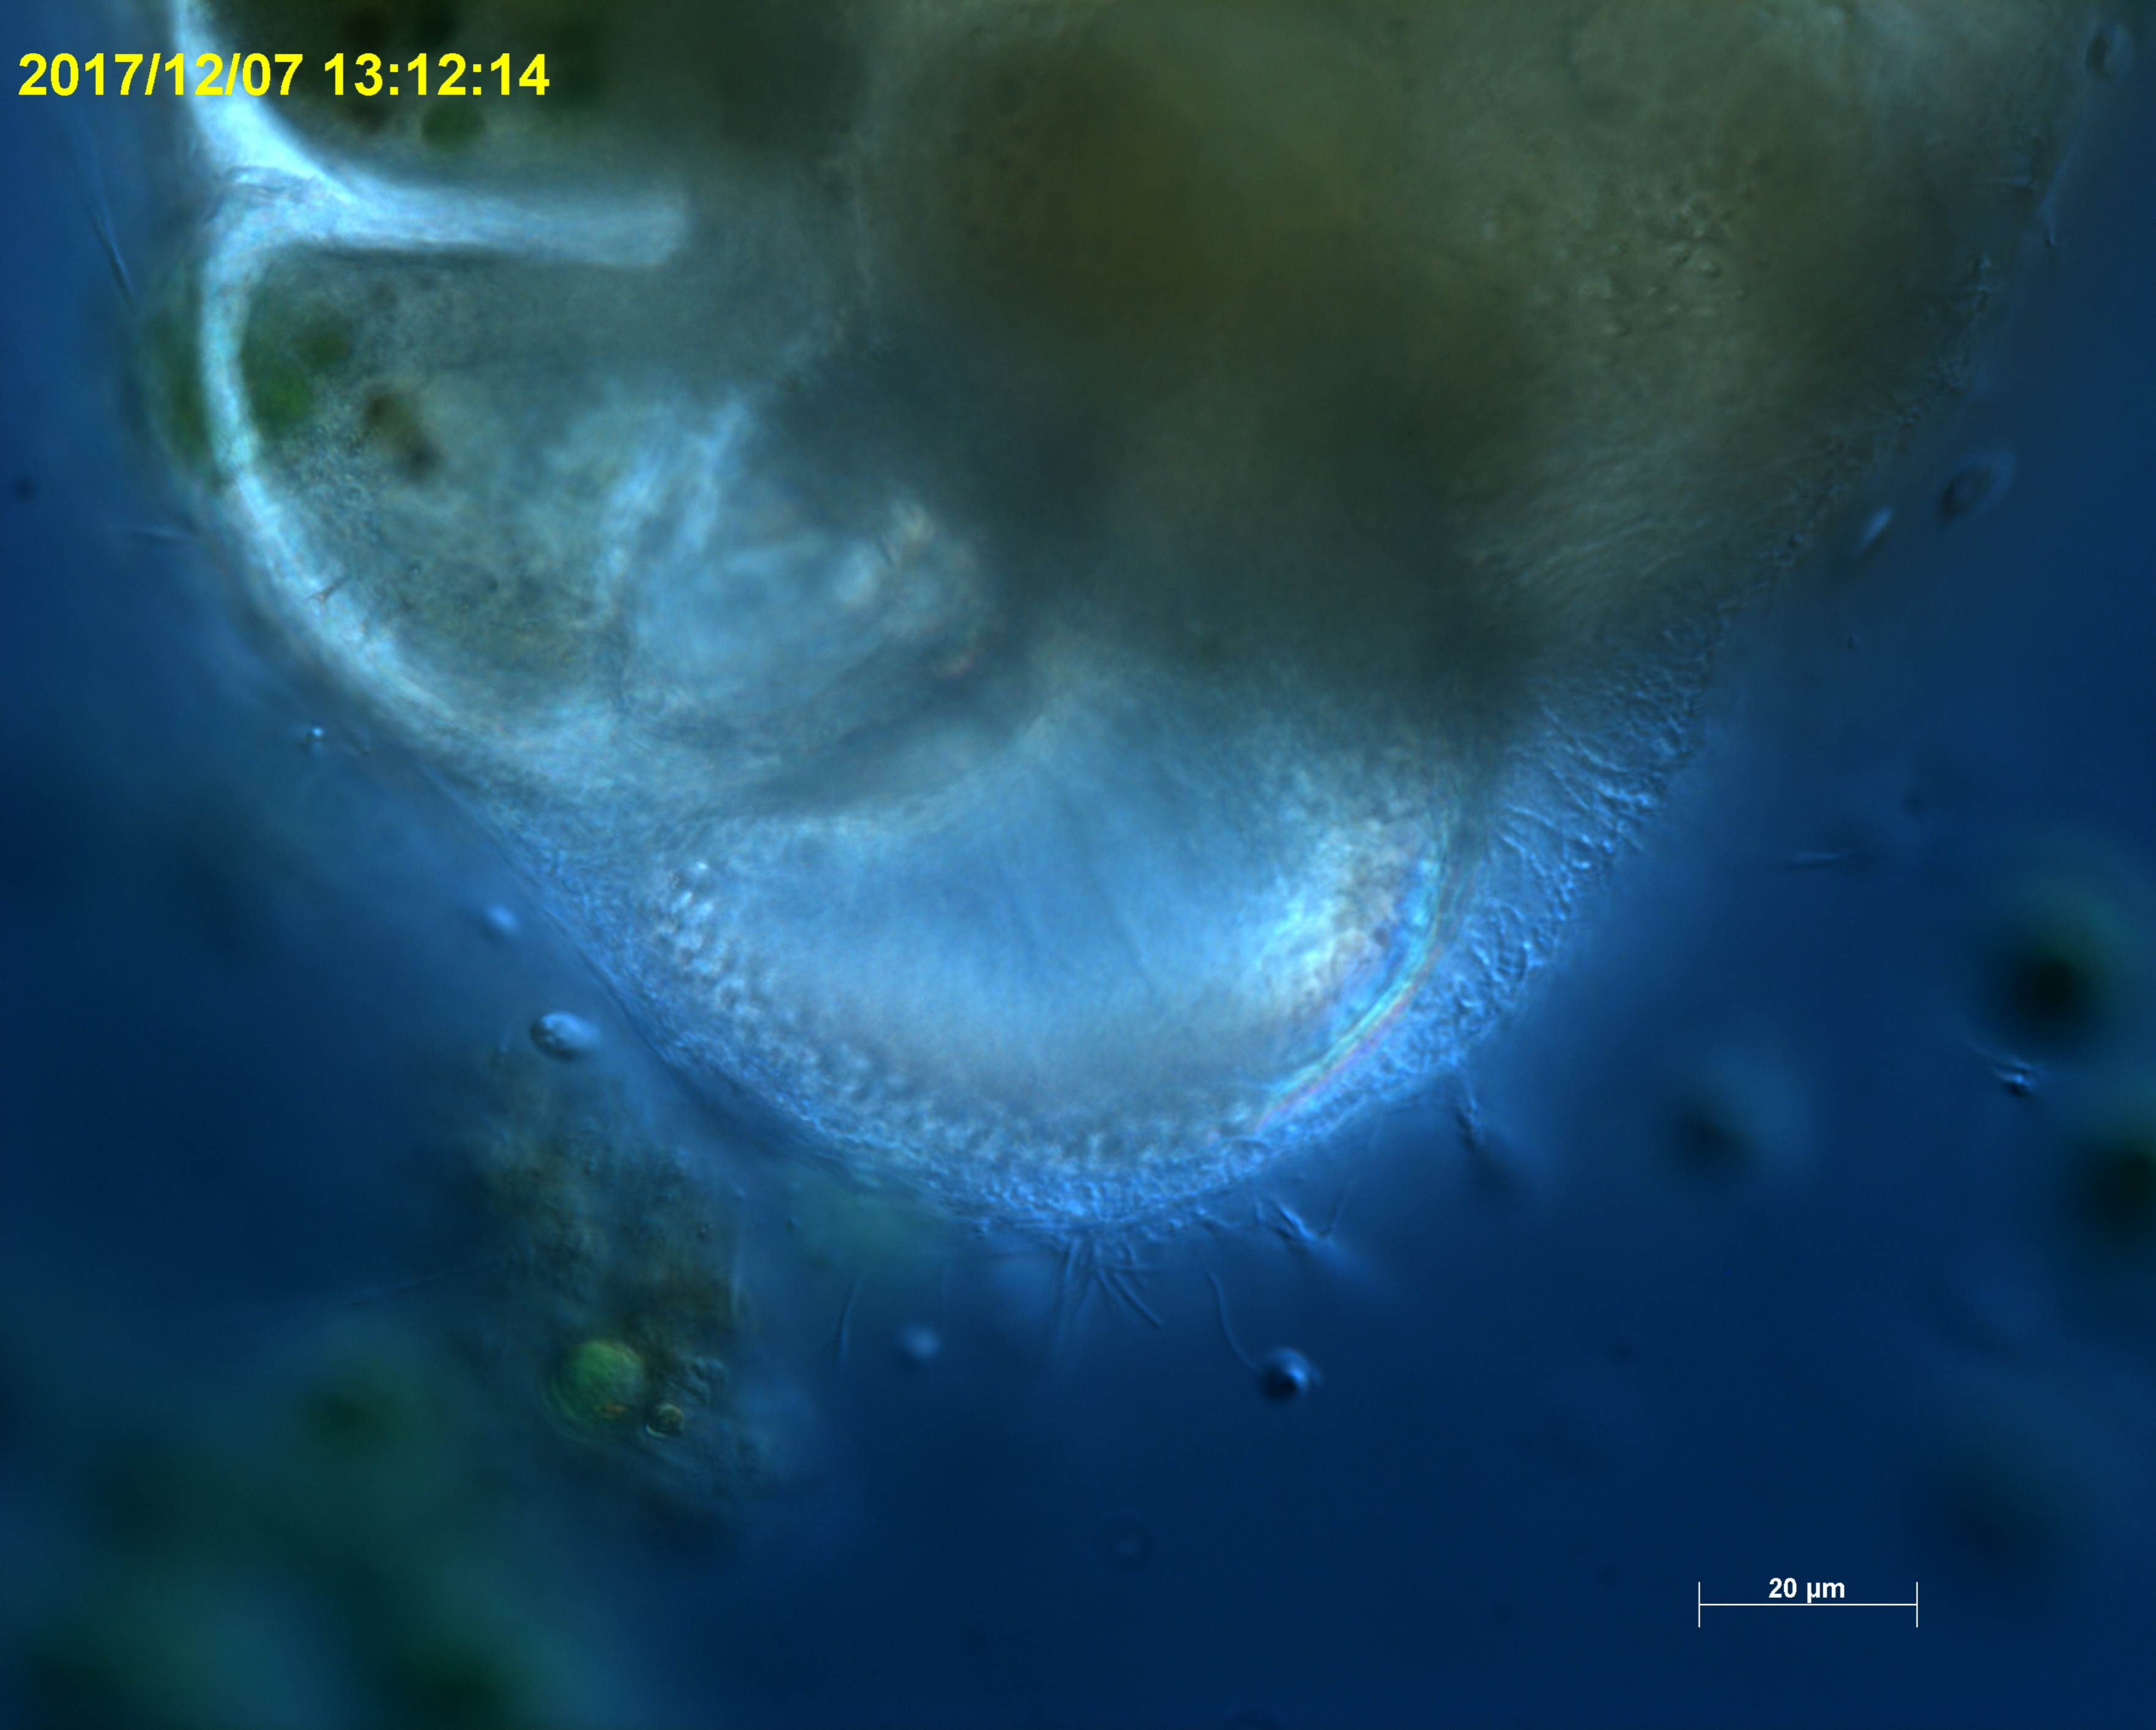

20  $\mu$ m



2017/12/07 13:50:35

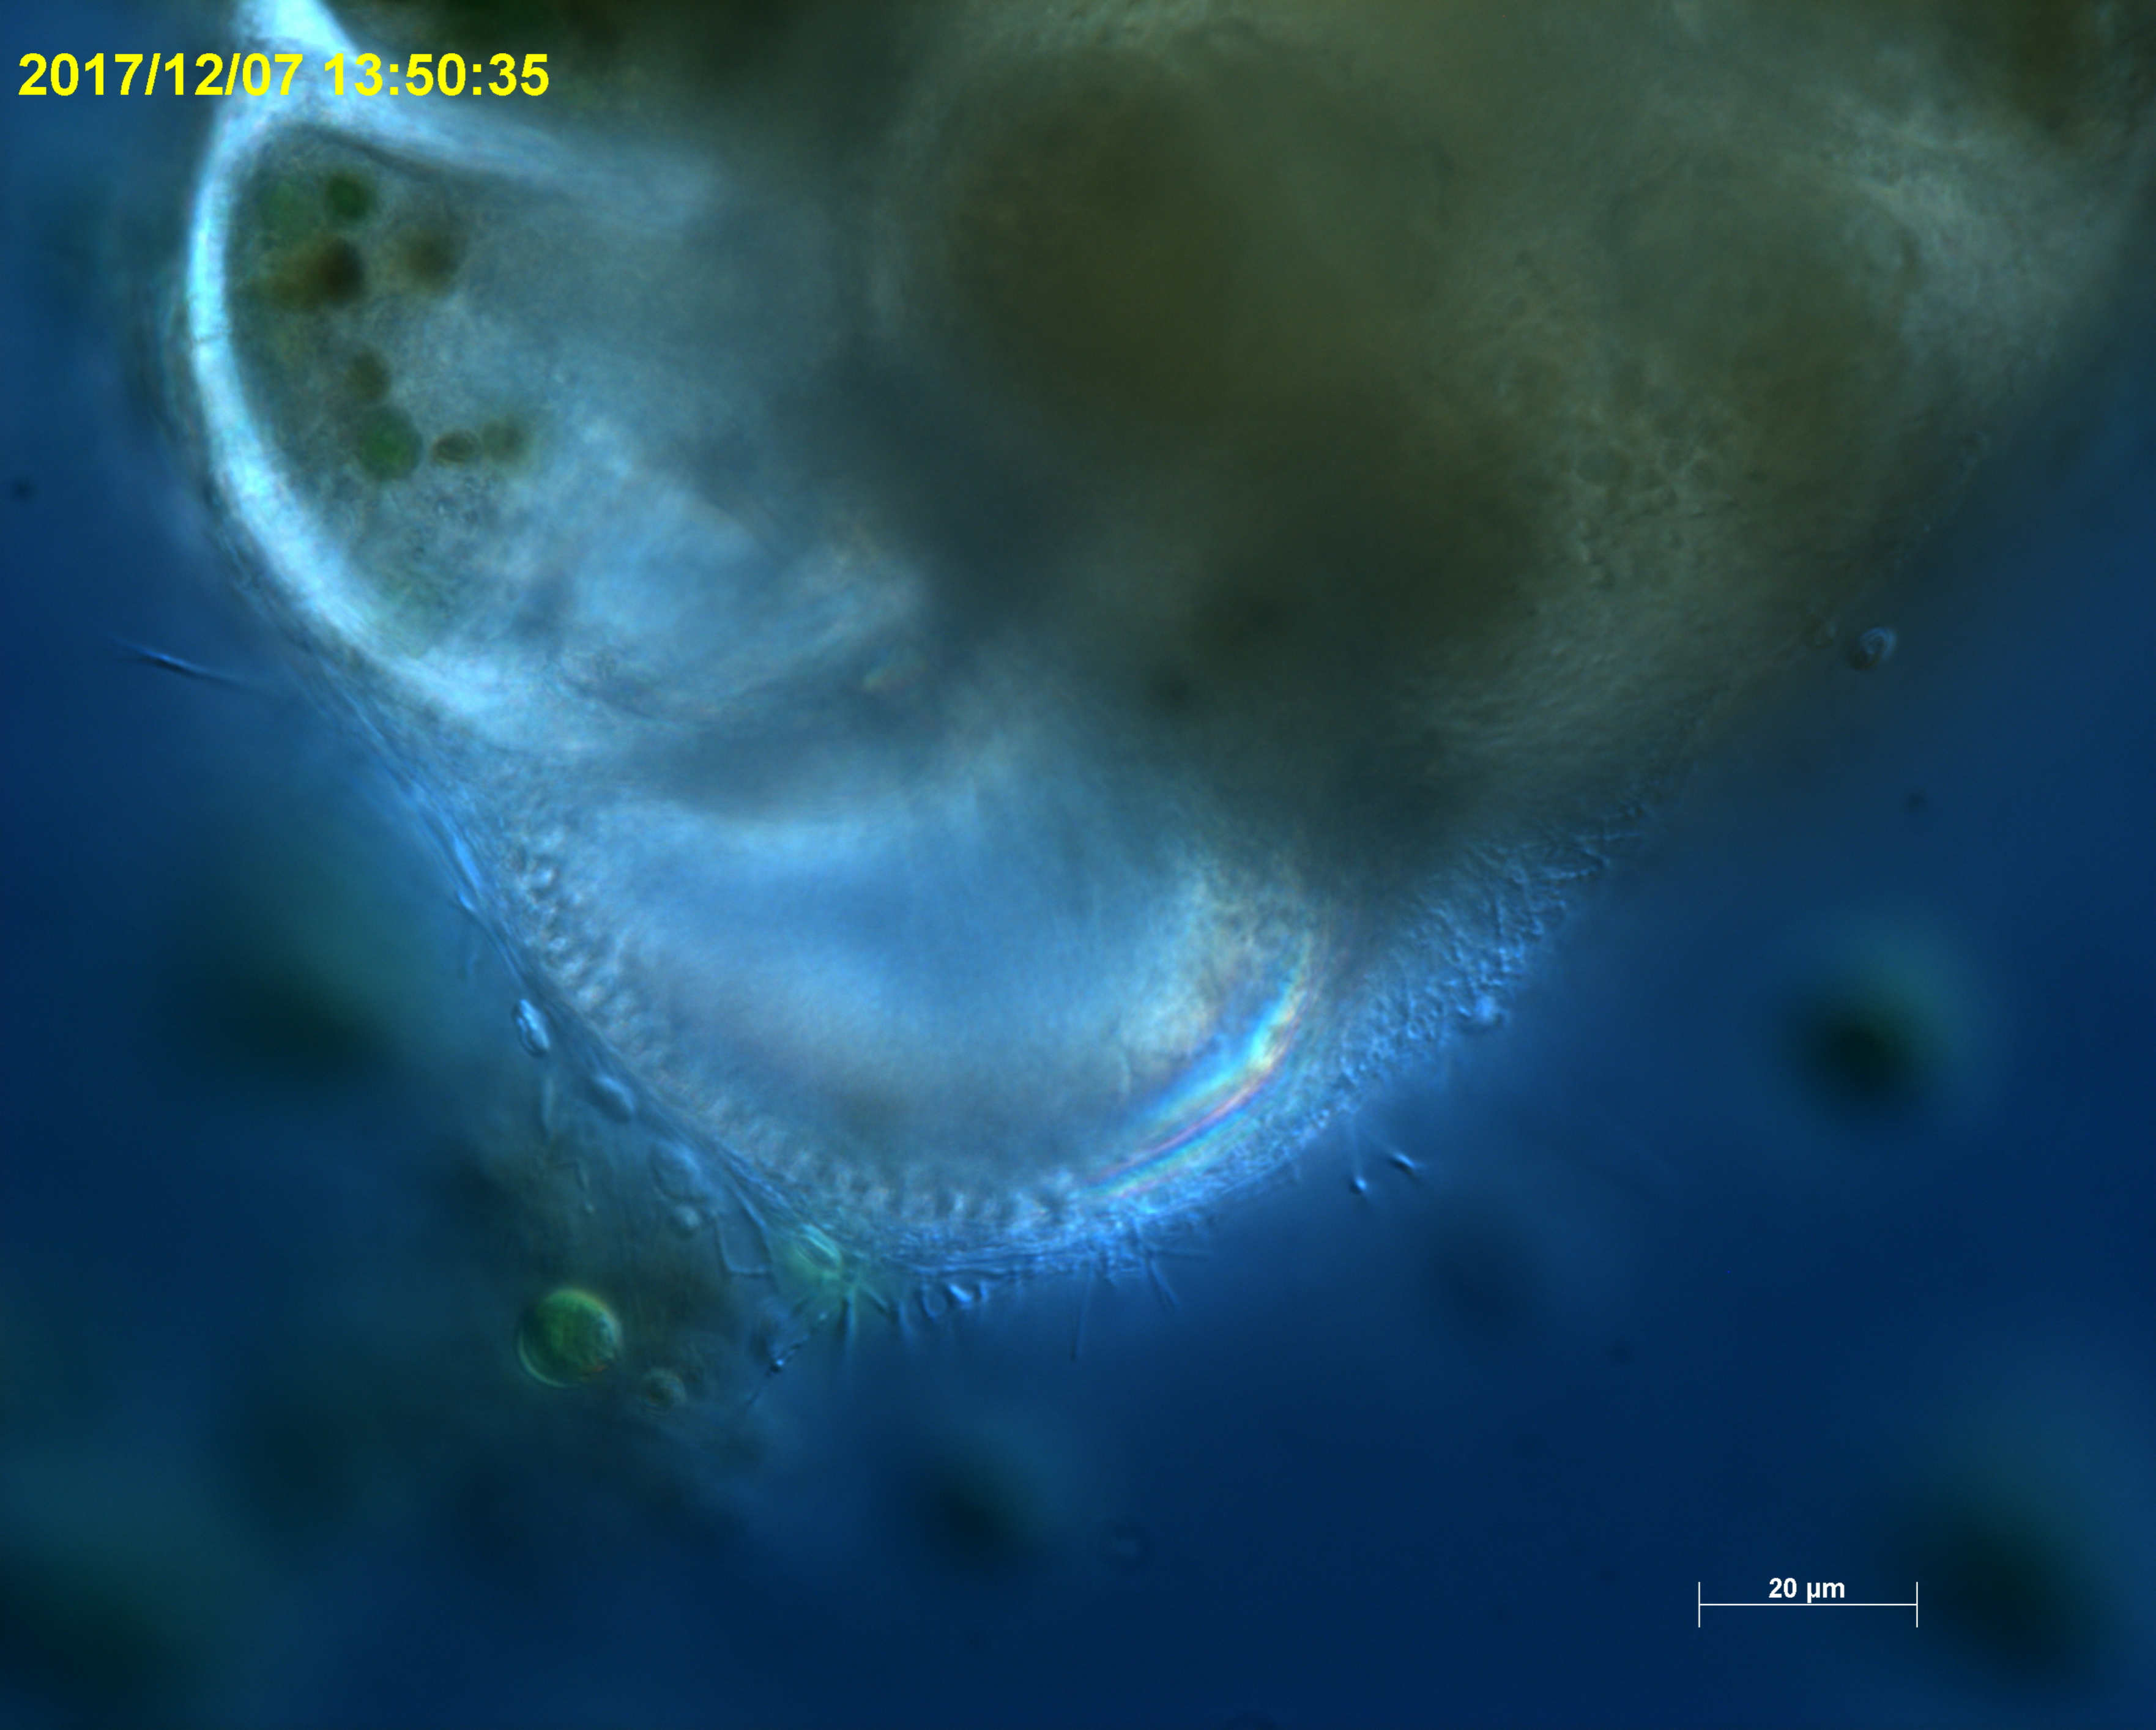

20  $\mu$ m
